# Supplementary material for: Characterization of the AGR2 Interactome Uncovers New Players of Protein Disulfide Isomerase Network in Cancer Cells
Source: PubMed Central journal article supplement (PMC8816719; doi:10.1016/j.mcpro.2021.100188), 2021-12-18
Supplement: mmc12.pdf [file mmc12.pdf]

**Tab. S1: List of the overlapping AGR2 interacting partners in T47D and H1299-AGR2 cells ( $\log_2FC > 0$ ,  $q < 0.05$ ) with protein localization and their roles in cells. ER, endoplasmic reticulum.**

|   | Uniprot ID | $\log_2FC$ T47D | $\log_2FC$ H1299-AGR2 | Entry name | Gene name      | Protein name                                 | Localization in cell (source: uniprot.org) | Role in cell (source: uniprot.org)                                                                                                                                                                                                                                                                                                                                                                                                                                                                                                                                                                                                                                                                                                                                                                                                                                                                                                                                                                                                                                                                                                                                                                                                                                                                                                                                                                                                                                                                                                                                                                                                                                       |
|---|------------|-----------------|-----------------------|------------|----------------|----------------------------------------------|--------------------------------------------|--------------------------------------------------------------------------------------------------------------------------------------------------------------------------------------------------------------------------------------------------------------------------------------------------------------------------------------------------------------------------------------------------------------------------------------------------------------------------------------------------------------------------------------------------------------------------------------------------------------------------------------------------------------------------------------------------------------------------------------------------------------------------------------------------------------------------------------------------------------------------------------------------------------------------------------------------------------------------------------------------------------------------------------------------------------------------------------------------------------------------------------------------------------------------------------------------------------------------------------------------------------------------------------------------------------------------------------------------------------------------------------------------------------------------------------------------------------------------------------------------------------------------------------------------------------------------------------------------------------------------------------------------------------------------|
| 1 | O95994     | 0.3762          | 12.5140               | AGR2       | <b>AGR2</b>    | anterior gradient 2                          | ER                                         | Required for MUC2 post-transcriptional synthesis and secretion. May play a role in the production of mucus by intestinal cells (By similarity). Proto-oncogene that may play a role in cell migration, cell differentiation and cell growth. Promotes cell adhesion (PubMed:23274113).                                                                                                                                                                                                                                                                                                                                                                                                                                                                                                                                                                                                                                                                                                                                                                                                                                                                                                                                                                                                                                                                                                                                                                                                                                                                                                                                                                                   |
| 2 | P14625     | 3.6711          | 7.2929                | ENPL       | <b>HSP90B1</b> | heat shock protein 90 beta family member 1   | ER                                         | Molecular chaperone that functions in the processing and transport of secreted proteins (By similarity). When associated with CNPY3, required for proper folding of Toll-like receptors (By similarity). Functions in endoplasmic reticulum associated degradation (ERAD) (PubMed:18264092). Has ATPase activity (By similarity).                                                                                                                                                                                                                                                                                                                                                                                                                                                                                                                                                                                                                                                                                                                                                                                                                                                                                                                                                                                                                                                                                                                                                                                                                                                                                                                                        |
| 3 | P11021     | 4.2576          | 6.0623                | GRP78      | <b>HSPA5</b>   | heat shock protein family A (Hsp70) member 5 | ER                                         | Endoplasmic reticulum chaperone that plays a key role in protein folding and quality control in the endoplasmic reticulum lumen (PubMed:2294010, PubMed:23769672, PubMed:23990668, PubMed:28332555). Involved in the correct folding of proteins and degradation of misfolded proteins via its interaction with DNAJC10/ERdj5, probably to facilitate the release of DNAJC10/ERdj5 from its substrate (By similarity). Acts as a key repressor of the ERN1/IRE1-mediated unfolded protein response (UPR) (PubMed:1550958, PubMed:19538957). In the unstressed endoplasmic reticulum, recruited by DNAJB9/ERdj4 to the luminal region of ERN1/IRE1, leading to disrupt the dimerization of ERN1/IRE1, thereby inactivating ERN1/IRE1 (By similarity). Accumulation of misfolded protein in the endoplasmic reticulum causes release of HSPA5/BiP from ERN1/IRE1, allowing homodimerization and subsequent activation of ERN1/IRE1 (By similarity). Plays an auxiliary role in post-translational transport of small presecretory proteins across endoplasmic reticulum (ER). May function as an allosteric modulator for SEC61 channel-forming translocon complex, likely cooperating with SEC62 to enable the productive insertion of these precursors into SEC61 channel. Appears to specifically regulate translocation of precursors having inhibitory residues in their mature region that weaken channel gating. AMPylation was initially reported to take place at Ser-365 and Thr-366 in vitro, and promote activation of HSPA5/BiP (PubMed:25601083). However, it was later shown that AMPylation takes place at Thr-518 and leads to inactivation of HSPA5/BiP. |
| 4 | P38646     | 0.5211          | 5.8264                | GRP75      | <b>HSPA9</b>   | heat shock protein family A (Hsp70) member 9 | mitochondria                               | Chaperone protein which plays an important role in mitochondrial iron-sulfur cluster (ISC) biogenesis. Interacts with and stabilizes ISC cluster assembly proteins FXN, NFS1, NFS1 and ISCU (PubMed:26702583). Regulates erythropoiesis via stabilization of ISC assembly (PubMed:21123823, PubMed:26702583). May play a role in the control of cell proliferation and cellular aging (By similarity).                                                                                                                                                                                                                                                                                                                                                                                                                                                                                                                                                                                                                                                                                                                                                                                                                                                                                                                                                                                                                                                                                                                                                                                                                                                                   |

|    |        |        |        |       |               |                                               |                               |                                                                                                                                                                                                                                                                                                                                                                                                                                                                                                                                                                                                                                                                                                                                                                                                                                                                                                                                                                                                                                                   |
|----|--------|--------|--------|-------|---------------|-----------------------------------------------|-------------------------------|---------------------------------------------------------------------------------------------------------------------------------------------------------------------------------------------------------------------------------------------------------------------------------------------------------------------------------------------------------------------------------------------------------------------------------------------------------------------------------------------------------------------------------------------------------------------------------------------------------------------------------------------------------------------------------------------------------------------------------------------------------------------------------------------------------------------------------------------------------------------------------------------------------------------------------------------------------------------------------------------------------------------------------------------------|
| 5  | P14314 | 4.9090 | 5.2369 | GLU2B | <b>PRKCSH</b> | protein kinase C substrate 80K-H              | ER                            | Regulatory subunit of glucosidase II that cleaves sequentially the 2 innermost alpha-1,3-linked glucose residues from the Glc2Man9GlcNAc2 oligosaccharide precursor of immature glycoproteins (PubMed:10929008). Required for efficient PKD1/Polycystin-1 biogenesis and trafficking to the plasma membrane of the primary cilia (By similarity)                                                                                                                                                                                                                                                                                                                                                                                                                                                                                                                                                                                                                                                                                                  |
| 6  | Q96RQ3 | 1.9626 | 5.1296 | MCCA  | <b>MCCC1</b>  | methylcrotonoyl-CoA carboxylase 1             | mitochondria                  | Biotin-attachment subunit of the 3-methylcrotonyl-CoA carboxylase, an enzyme that catalyzes the conversion of 3-methylcrotonyl-CoA to 3-methylglutaconyl-CoA, a critical step for leucine and isovaleric acid catabolism.                                                                                                                                                                                                                                                                                                                                                                                                                                                                                                                                                                                                                                                                                                                                                                                                                         |
| 7  | Q15084 | 5.6068 | 4.8100 | PDIA6 | <b>PDIA6</b>  | protein disulfide isomerase family A member 6 | ER, cell membrane, melanosome | May function as a chaperone that inhibits aggregation of misfolded proteins (PubMed:12204115). Negatively regulates the unfolded protein response (UPR) through binding to UPR sensors such as ERN1, which in turn inactivates ERN1 signaling (PubMed:24508390). May also regulate the UPR via the EIF2AK3 UPR sensor (PubMed:24508390). Plays a role in platelet aggregation and activation by agonists such as convulxin, collagen and thrombin (PubMed:15466936).                                                                                                                                                                                                                                                                                                                                                                                                                                                                                                                                                                              |
| 8  | Q9HCC0 | 7.9606 | 4.2815 | MCCB  | <b>MCCC2</b>  | methylcrotonoyl-CoA carboxylase 2             | mitochondria                  | Carboxyltransferase subunit of the 3-methylcrotonyl-CoA carboxylase, an enzyme that catalyzes the conversion of 3-methylcrotonyl-CoA to 3-methylglutaconyl-CoA, a critical step for leucine and isovaleric acid catabolism.                                                                                                                                                                                                                                                                                                                                                                                                                                                                                                                                                                                                                                                                                                                                                                                                                       |
| 9  | P27797 | 6.0288 | 3.3646 | CALR  | <b>CALR</b>   | calreticulin                                  | ER                            | Calcium-binding chaperone that promotes folding, oligomeric assembly and quality control in the endoplasmic reticulum (ER) via the calreticulin/calnexin cycle. This lectin interacts transiently with almost all of the monoglucosylated glycoproteins that are synthesized in the ER. Interacts with the DNA-binding domain of NR3C1 and mediates its nuclear export. Involved in maternal gene expression regulation. May participate in oocyte maturation via the regulation of calcium homeostasis (By similarity).                                                                                                                                                                                                                                                                                                                                                                                                                                                                                                                          |
| 10 | P05165 | 1.1893 | 3.3443 | PCCA  | <b>PCCA</b>   | propionyl-CoA carboxylase subunit alpha       | mitochondria                  | This is one of the 2 subunits of the biotin-dependent propionyl-CoA carboxylase (PCC), a mitochondrial enzyme involved in the catabolism of odd chain fatty acids, branched-chain amino acids isoleucine, threonine, methionine, and valine and other metabolites (PubMed:8434582, PubMed:6765947). Propionyl-CoA carboxylase catalyzes the carboxylation of propionyl-CoA/propanoyl-CoA to D-methylmalonyl-CoA/(S)-methylmalonyl-CoA (PubMed:8434582, PubMed:6765947, PubMed:10101253). Within the holoenzyme, the alpha subunit catalyzes the ATP-dependent carboxylation of the biotin carried by the biotin carboxyl carrier (BCC) domain, while the beta subunit then transfers the carboxyl group from carboxylated biotin to propionyl-CoA (By similarity). Propionyl-CoA carboxylase also significantly acts on butyryl-CoA/butanoyl-CoA, which is converted to ethylmalonyl-CoA/(2S)-ethylmalonyl-CoA at a much lower rate (PubMed:6765947). Other alternative minor substrates include (2E)-butenoyl-CoA/crotonoyl-CoA (By similarity). |
| 11 | Q00839 | 0.8350 | 3.2388 | HNRPU | <b>HNRNPU</b> | heterogeneous nuclear ribonucleoprotein U     | nucleus                       | DNA- and RNA-binding protein involved in several cellular processes such as nuclear chromatin organization, telomere-length regulation, transcription, mRNA alternative splicing and stability, Xist-mediated transcriptional silencing and mitotic cell progression (PubMed:10490622, PubMed:18082603, PubMed:19029303, PubMed:22325991, PubMed:25986610, PubMed:28622508).                                                                                                                                                                                                                                                                                                                                                                                                                                                                                                                                                                                                                                                                      |

|           |        |        |        |       |                |                                               |              |                                                                                                                                                                                                                                                                                                                                                                                                                                                                                                                                                                                                                   |
|-----------|--------|--------|--------|-------|----------------|-----------------------------------------------|--------------|-------------------------------------------------------------------------------------------------------------------------------------------------------------------------------------------------------------------------------------------------------------------------------------------------------------------------------------------------------------------------------------------------------------------------------------------------------------------------------------------------------------------------------------------------------------------------------------------------------------------|
| <b>12</b> | P30101 | 6.0095 | 2.6868 | PDIA3 | <b>PDIA3</b>   | protein disulfide isomerase family A member 3 | ER           |                                                                                                                                                                                                                                                                                                                                                                                                                                                                                                                                                                                                                   |
| <b>13</b> | P12236 | 0.7001 | 2.4526 | ADT3  | <b>SLC25A6</b> | solute carrier family 25 member 6             | mitochondria | Catalyzes the exchange of cytoplasmic ADP with mitochondrial ATP across the mitochondrial inner membrane. May participate in the formation of the permeability transition pore complex (PTPC) responsible for the release of mitochondrial products that triggers apoptosis.                                                                                                                                                                                                                                                                                                                                      |
| <b>14</b> | P04843 | 1.0611 | 2.3978 | RPN1  | <b>RPN1</b>    | ribophorin I                                  | ER           | Subunit of the oligosaccharyl transferase (OST) complex that catalyzes the initial transfer of a defined glycan (Glc3Man9GlcNAc2 in eukaryotes) from the lipid carrier dolichol-pyrophosphate to an asparagine residue within an Asn-X-Ser/Thr consensus motif in nascent polypeptide chains, the first step in protein N-glycosylation. N-glycosylation occurs cotranslationally and the complex associates with the Sec61 complex at the channel-forming translocon complex that mediates protein translocation across the endoplasmic reticulum (ER). All subunits are required for a maximal enzyme activity. |
| <b>15</b> | O75369 | 0.2854 | 2.1332 | FLNB  | <b>FLNB</b>    | filamin B                                     | cytoskeleton | Connects cell membrane constituents to the actin cytoskeleton. May promote orthogonal branching of actin filaments and links actin filaments to membrane glycoproteins. Anchors various transmembrane proteins to the actin cytoskeleton. Interaction with FLNA may allow neuroblast migration from the ventricular zone into the cortical plate. Various interactions and localizations of isoforms affect myotube morphology and myogenesis. Isoform 6 accelerates muscle differentiation in vitro.                                                                                                             |
| <b>16</b> | P11498 | 0.6543 | 1.8363 | PYC   | <b>PC</b>      | pyruvate carboxylase                          | mitochondria | Pyruvate carboxylase catalyzes a 2-step reaction, involving the ATP-dependent carboxylation of the covalently attached biotin in the first step and the transfer of the carboxyl group to pyruvate in the second. Catalyzes in a tissue specific manner, the initial reactions of glucose (liver, kidney) and lipid (adipose tissue, liver, brain) synthesis from pyruvate.                                                                                                                                                                                                                                       |

**Tab. S2: Statistically significant BIOCARTA and REACTOME pathways (NOM p-value < 0.05) based on Gene Set Enrichment Analysis (GSEA) of enriched AGR2 protein-protein interacting partners (log2FC > 0) identified in T47D cells using LFQ and in AGR2 stably transfected H1299 cells using SILAC quantification.** Pathways highlighted in bold (i) were enriched for proteins from both T47D and H1299 cells AND (ii) contain proteins from PDIA family. PDIA family proteins are highlighted in bold. No statistically significant pathways were identified for proteins from H1299 cells in BIOCARTA database.

| BIOCARTA                                                                 | T47D cells (LFQ)                                   |   | Core enriched proteins |                                                                                                                      |
|--------------------------------------------------------------------------|----------------------------------------------------|---|------------------------|----------------------------------------------------------------------------------------------------------------------|
|                                                                          | VITCB_PATHWAY                                      | ● | ●                      | ●                                                                                                                    |
| HIF_PATHWAY                                                              | ●                                                  | ● | ●                      | PDIA1                                                                                                                |
| IL2RB_PATHWAY                                                            | ●                                                  | ○ | ○                      | PPIA                                                                                                                 |
| E                                                                        | T47D cells (LFQ)                                   |   | Core enriched proteins |                                                                                                                      |
|                                                                          | <b>DIABETES_PATHWAYS</b>                           | ● | ●                      | CALR, HYOU1, <b>PDIA6</b> , TPP1, GRP78, DJB11, ENPL, SPCS2, SSRA                                                    |
| <b>UNFOLDED_PROTEIN_RESPONSE</b>                                         | ●                                                  | ● | ●                      | CALR, HYOU1, <b>PDIA6</b> , TPP1, GRP78, DJB11, ENPL, SSRA                                                           |
| ANTIGEN_PRESENTATION_FOLDING_ASSEMBLY_AND_PEPTIDE_LOADING_OF_CLASS_I_MHC | ●                                                  | ● | ●                      | CALR, <b>PDIA3</b> , GRP78, CALX                                                                                     |
| CHYLOMICRON_MEDIATED_LIPID_TRANSPORT                                     | ●                                                  | ● | ●                      | <b>PDIA1</b>                                                                                                         |
| LIPOPROTEIN_METABOLISM                                                   | ●                                                  | ● | ●                      | <b>PDIA1</b>                                                                                                         |
| CALNEXIN_CALRETICULIN_CYCLE                                              | ●                                                  | ● | ●                      | CALR, <b>PDIA3</b> , GLU2B, UGGG1, CALX                                                                              |
| ACTIVATION_OF_CHAPERONES_BY_ATF6_ALPHA                                   | ●                                                  | ● | ●                      | CALR, GRP78, ENPL                                                                                                    |
| N_GLYCAN_TRIMMING_IN_THE_ER_AND_CALNEXIN_CALRETICULIN_CYCLE              | ●                                                  | ● | ●                      | CALR, <b>PDIA3</b> , GLU2B, UGGG1, CALX                                                                              |
| ACTIVATION_OF_CHAPERONE_GENES_BY_XBP1S                                   | ●                                                  | ● | ●                      | HYOU1, <b>PDIA6</b> , TPP1, DJB11, SSRA                                                                              |
| ACTIVATION_OF_CHAPERONE_GENES_BY_ATF6_ALPHA                              | ●                                                  | ● | ●                      | CALR, GRP78, ENPL                                                                                                    |
| CLASS_I_MHC_MEDIATED_ANTIGEN_PROCESSING_PRESENTATION                     | ●                                                  | ● | ●                      | CALR, <b>PDIA3</b> , GRP78, CALX                                                                                     |
| INFLUENZA_LIFE_CYCLE                                                     | ●                                                  | ● | ●                      | CALR, TPR, CANX, RS7, CLTC                                                                                           |
| <b>ASPARAGINE_N_LINKED_GLYCOSYLATION</b>                                 | ●                                                  | ● | ●                      | CALR, <b>PDIA3</b> , LMAN1, GLU2B, UGGG1, OST48, CALX                                                                |
| IMMUNE_SYSTEM                                                            | ●                                                  | ● | ●                      | CALR, <b>PDIA3</b> , TPR, GLU2B, GRP78, OST48, ENPL, CALX, CLH1, CDC42, CATD, RAC1, SC61B, CADH1, NU214, CATB, THIOM |
| ER_PHAGOSOME_PATHWAY                                                     | ●                                                  | ● | ●                      | CALR, <b>PDIA3</b>                                                                                                   |
| COLLAGEN_FORMATION                                                       | ●                                                  | ● | ●                      | PPIB, <b>PDIA1</b>                                                                                                   |
| ANTIGEN_PROCESSING_CROSS_PRESENTATION                                    | ●                                                  | ● | ●                      | CALR, <b>PDIA3</b>                                                                                                   |
| CITRIC_ACID_CYCLE_TCA_CYCLE                                              | ●                                                  | ● | ●                      | MDHM, SUCA, SDHA, DLST, ACO2, CISY                                                                                   |
| EXTRACELLULAR_MATRIX_ORGANIZATION                                        | ●                                                  | ● | ●                      | PPIB, <b>PDIA1</b>                                                                                                   |
| PYRUVATE_METABOLISM_AND_CITRIC_ACID_TCA_CYCLE                            | ●                                                  | ● | ●                      | MDHM, PDHA1, SUCA, SDHA, ODO2, ACON, CISY                                                                            |
| <b>POST_TRANSLATIONAL_PROTEIN_MODIFICATION</b>                           | ●                                                  | ● | ●                      | CALR, <b>PDIA3</b> , LMAN1, GLU2B, UGGG1, OST48, CALX                                                                |
| BINDING_AND_ENTRY_OF_HIV_VIRION                                          | ●                                                  | ● | ●                      | PPIA                                                                                                                 |
| EGFR_DOWNREGULATION                                                      | ●                                                  | ● | ●                      | CLH1, CDC42                                                                                                          |
| GLUCOSE_METABOLISM                                                       | ●                                                  | ● | ●                      | CMC2, MDHM, M2OM, TXTP, PCKGM                                                                                        |
| GLUCONEOGENESIS                                                          | ●                                                  | ● | ●                      | CMC2, MDHM, M2OM, TXTP, PCKGM                                                                                        |
| PERK_REGULATED_GENE_EXPRESSION                                           | ●                                                  | ● | ●                      | GRP78                                                                                                                |
| AXON_GUIDANCE                                                            | ●                                                  | ● | ●                      | RHOA, CLH1, CDC42, RAC1                                                                                              |
| APOBEC3G_MEDIATED_RESISTANCE_TO_HIV1_INFECTION                           | ●                                                  | ● | ●                      | PPIA                                                                                                                 |
| A                                                                        | H1299 cells (SILAC)                                |   | Core enriched proteins |                                                                                                                      |
|                                                                          | <b>TRAFFICKING_AND_PROCESSING_OF_ENDOSOMAL_TLR</b> | ● | ●                      | ●                                                                                                                    |
| <b>DESTABILIZATION_OF_MRNA_BY_AUF1_HNRNP_D0</b>                          | ●                                                  | ● | ●                      | HS71B, HSP7C                                                                                                         |
| <b>UNFOLDED_PROTEIN_RESPONSE</b>                                         | ●                                                  | ● | ●                      | ENPL, GRP78, <b>PDIA6</b> , CALR, LMNA                                                                               |
| MUSCLE_CONTRACTION                                                       | ●                                                  | ● | ●                      | VIME, TPM3                                                                                                           |
| ACTIVATION_OF_CHAPERONE_GENES_BY_ATF6_ALPHA                              | ●                                                  | ● | ●                      | ENPL, GRP78, CALR                                                                                                    |
| STRIATED_MUSCLE_CONTRACTION                                              | ●                                                  | ● | ●                      | VIME, TPM3                                                                                                           |
| ACTIVATION_OF_CHAPERONES_BY_ATF6_ALPHA                                   | ●                                                  | ● | ●                      | ENPL, GRP78, CALR                                                                                                    |
| PERK_REGULATED_GENE_EXPRESSION                                           | ●                                                  | ● | ●                      | GRP78                                                                                                                |
| <b>DIABETES_PATHWAYS</b>                                                 | ●                                                  | ● | ●                      | ENPL, GRP78, <b>PDIA6</b> , CALR, LMNA                                                                               |
| BRANCHED_CHAIN_AMINO_ACID_CATABOLISM                                     | ●                                                  | ● | ●                      | MCCA, MCCB                                                                                                           |
| MITOCHONDRIAL_PROTEIN_IMPORT                                             | ●                                                  | ● | ●                      | GRP75, CH60, ATPB, ATPA, ADT3, TOMM22                                                                                |
| METABOLISM_OF_AMINO_ACIDS_AND_DERIVATIVES                                | ●                                                  | ● | ●                      | MCCA, MCCB                                                                                                           |
| <b>POST_TRANSLATIONAL_PROTEIN_MODIFICATION</b>                           | ●                                                  | ● | ●                      | GLU2B, CALR, <b>PDIA3</b> , OST48, RPN1, GANAB, DAD1                                                                 |
| <b>ASPARAGINE_N_LINKED_GLYCOSYLATION</b>                                 | ●                                                  | ● | ●                      | GLU2B, CALR, <b>PDIA3</b> , OST48, RPN1, GANAB, DAD1                                                                 |

NOM p-value ● 0.00 ● 0.01 ● 0.02 ● 0.03 ● 0.04 ○ 0.05 enrichment score ○ 1.0 ○ 0.9 ○ 0.8 ○ 0.7 ○ 0.6 ○ 0.5

**Tab. S3: Binding interface classification of the top 10 solutions from Galaxy Heteromer of AGR2 monomeric or dimeric form to PDIA3.** The first column identifies the binding interface. The second one the quaternary structure of AGR2. The third one the replica number. The fourth one the rank of the model, the fifth the score from Galaxy Heteromer (in arbitrary units) and the sixth the cluster size.

| PDIA3 binding site    | AGR2 quaternary structures | Replica | Model number (rank) | TongDock_A score [a.u.] | TongDock_A cluster size [N] |
|-----------------------|----------------------------|---------|---------------------|-------------------------|-----------------------------|
| Between a, a' domains | Monomer                    | 1       | 1                   | 963.472                 | 23                          |
| Between a, a' domains | Monomer                    | 2       | 1                   | 963.472                 | 23                          |
| Between a, a' domains | Monomer                    | 3       | 1                   | 963.472                 | 23                          |
| Between a, a' domains | Monomer                    | 1       | 2                   | 923.644                 | 20                          |
| Between a, a' domains | Monomer                    | 2       | 2                   | 923.644                 | 20                          |
| Between a, a' domains | Monomer                    | 3       | 2                   | 923.644                 | 20                          |
| Between a, a' domains | Monomer                    | 1       | 3                   | 911.832                 | 20                          |
| Between a, a' domains | Monomer                    | 2       | 3                   | 911.832                 | 20                          |
| Between a, a' domains | Monomer                    | 3       | 3                   | 911.832                 | 20                          |
| Between a, a' domains | Monomer                    | 1       | 5                   | 897.613                 | 14                          |
| Between a, a' domains | Monomer                    | 2       | 5                   | 897.613                 | 14                          |
| Between a, a' domains | Monomer                    | 3       | 5                   | 897.613                 | 14                          |
| Between a, a' domains | Monomer                    | 1       | 7                   | 789.893                 | 13                          |
| Between a, a' domains | Monomer                    | 2       | 7                   | 789.893                 | 13                          |
| Between a, a' domains | Monomer                    | 3       | 7                   | 789.893                 | 13                          |
| Between a, a' domains | Monomer                    | 1       | 8                   | 781.039                 | 12                          |
| Between a, a' domains | Monomer                    | 2       | 8                   | 781.039                 | 12                          |
| Between a, a' domains | Monomer                    | 3       | 8                   | 781.039                 | 12                          |
| Between a, a' domains | Monomer                    | 1       | 10                  | 893.49                  | 10                          |
| Between a, a' domains | Monomer                    | 2       | 10                  | 893.49                  | 10                          |
| Between a, a' domains | Monomer                    | 3       | 10                  | 893.49                  | 10                          |
| Between a, a' domains | Dimer                      | 1       | 4                   | 1130.624                | 11                          |
| Between a, a' domains | Dimer                      | 2       | 4                   | 1130.624                | 11                          |
| Between a, a' domains | Dimer                      | 3       | 4                   | 1130.624                | 11                          |
| Between a, a' domains | Dimer                      | 1       | 5                   | 944.027                 | 11                          |
| Between a, a' domains | Dimer                      | 2       | 5                   | 944.027                 | 11                          |
| Between a, a' domains | Dimer                      | 3       | 5                   | 944.027                 | 11                          |
| Between a, a' domains | Dimer                      | 1       | 6                   | 869.312                 | 11                          |
| Between a, a' domains | Dimer                      | 2       | 6                   | 869.312                 | 11                          |
| Between a, a' domains | Dimer                      | 3       | 6                   | 869.312                 | 11                          |
| Between a, a' domains | Dimer                      | 1       | 8                   | 1009.848                | 10                          |
| Between a, a' domains | Dimer                      | 2       | 8                   | 1009.848                | 10                          |
| Between a, a' domains | Dimer                      | 3       | 8                   | 1009.848                | 10                          |
| Between a, a' domains | Dimer                      | 1       | 9                   | 967.513                 | 10                          |
| Between a, a' domains | Dimer                      | 2       | 9                   | 967.513                 | 10                          |
| Between a, a' domains | Dimer                      | 3       | 9                   | 967.513                 | 10                          |
| b domain              | Monomer                    | 1       | 6                   | 907.039                 | 13                          |
| b domain              | Monomer                    | 2       | 6                   | 907.039                 | 13                          |
| b domain              | Monomer                    | 3       | 6                   | 907.039                 | 13                          |
| b domain              | Dimer                      | 1       | 2                   | 860.152                 | 13                          |
| b domain              | Dimer                      | 2       | 2                   | 860.152                 | 13                          |
| b domain              | Dimer                      | 3       | 2                   | 860.152                 | 13                          |
| b domain              | Dimer                      | 1       | 7                   | 829.141                 | 11                          |
| b domain              | Dimer                      | 2       | 7                   | 829.141                 | 11                          |
| b domain              | Dimer                      | 3       | 7                   | 829.141                 | 11                          |

|                       |         |   |    |         |    |
|-----------------------|---------|---|----|---------|----|
| b' domain             | Monomer | 1 | 9  | 989.408 | 10 |
| b' domain             | Monomer | 2 | 9  | 989.408 | 10 |
| b' domain             | Monomer | 3 | 9  | 989.408 | 10 |
| Outside a, a' domains | Monomer | 1 | 4  | 911.545 | 20 |
| Outside a, a' domains | Monomer | 2 | 4  | 911.545 | 20 |
| Outside a, a' domains | Monomer | 3 | 4  | 911.545 | 20 |
| Outside a, a' domains | Dimer   | 1 | 1  | 920.692 | 14 |
| Outside a, a' domains | Dimer   | 2 | 1  | 920.692 | 14 |
| Outside a, a' domains | Dimer   | 3 | 1  | 920.692 | 14 |
| Outside a, a' domains | Dimer   | 1 | 3  | 850.929 | 12 |
| Outside a, a' domains | Dimer   | 2 | 3  | 850.929 | 12 |
| Outside a, a' domains | Dimer   | 3 | 3  | 850.929 | 12 |
| Outside a, a' domains | Dimer   | 1 | 10 | 877.029 | 10 |
| Outside a, a' domains | Dimer   | 2 | 10 | 877.029 | 10 |
| Outside a, a' domains | Dimer   | 3 | 10 | 877.029 | 10 |

**Tab. S4: Binding interface classification of the top 10 solutions from ClusPro of AGR2 monomeric or dimeric form to PDIA3.** The first column identifies the binding interface. The second one the quaternary structure of AGR2. The third one the replica number. The fourth one the rank of the model, the fifth the cluster size, and the sixth the score from ClusPro (using the balanced coefficient), in arbitrary units.

| PDIA3 binding site    | AGR2 quaternary structures | Replica | Cluster number (rank) | Cluster size | Weighted score of the cluster center [a.u.] |
|-----------------------|----------------------------|---------|-----------------------|--------------|---------------------------------------------|
| Between a, a' domains | Monomer                    | 1       | 0                     | 146          | -916.6                                      |
| Between a, a' domains | Monomer                    | 2       | 0                     | 146          | -916.6                                      |
| Between a, a' domains | Monomer                    | 3       | 0                     | 146          | -916.6                                      |
| Between a, a' domains | Monomer                    | 1       | 1                     | 44           | -779.2                                      |
| Between a, a' domains | Monomer                    | 2       | 1                     | 44           | -779.2                                      |
| Between a, a' domains | Monomer                    | 3       | 1                     | 44           | -779.2                                      |
| Between a, a' domains | Monomer                    | 1       | 2                     | 40           | -815.7                                      |
| Between a, a' domains | Monomer                    | 2       | 2                     | 40           | -815.7                                      |
| Between a, a' domains | Monomer                    | 3       | 2                     | 40           | -815.7                                      |
| Between a, a' domains | Monomer                    | 1       | 3                     | 39           | -773.0                                      |
| Between a, a' domains | Monomer                    | 2       | 3                     | 39           | -773.0                                      |
| Between a, a' domains | Monomer                    | 3       | 3                     | 39           | -773.0                                      |
| Between a, a' domains | Monomer                    | 1       | 4                     | 38           | -764.9                                      |
| Between a, a' domains | Monomer                    | 2       | 4                     | 38           | -764.9                                      |
| Between a, a' domains | Monomer                    | 3       | 4                     | 38           | -764.9                                      |
| Between a, a' domains | Monomer                    | 1       | 5                     | 32           | -779.7                                      |
| Between a, a' domains | Monomer                    | 2       | 5                     | 32           | -779.7                                      |
| Between a, a' domains | Monomer                    | 3       | 5                     | 32           | -779.7                                      |
| Between a, a' domains | Monomer                    | 1       | 6                     | 27           | -839.2                                      |
| Between a, a' domains | Monomer                    | 2       | 6                     | 27           | -839.2                                      |
| Between a, a' domains | Monomer                    | 3       | 6                     | 27           | -839.2                                      |
| Between a, a' domains | Monomer                    | 1       | 7                     | 26           | -750.3                                      |
| Between a, a' domains | Monomer                    | 2       | 7                     | 26           | -750.3                                      |
| Between a, a' domains | Monomer                    | 3       | 7                     | 26           | -750.3                                      |
| Between a, a' domains | Monomer                    | 1       | 8                     | 26           | -769.3                                      |
| Between a, a' domains | Monomer                    | 2       | 8                     | 26           | -769.3                                      |
| Between a, a' domains | Monomer                    | 3       | 8                     | 26           | -769.3                                      |
| Between a, a' domains | Monomer                    | 1       | 9                     | 26           | -775.6                                      |
| Between a, a' domains | Monomer                    | 2       | 9                     | 26           | -775.6                                      |
| Between a, a' domains | Monomer                    | 3       | 9                     | 26           | -775.6                                      |
| Between a, a' domains | Dimer                      | 1       | 0                     | 48           | -1004.1                                     |
| Between a, a' domains | Dimer                      | 2       | 0                     | 48           | -1004.1                                     |
| Between a, a' domains | Dimer                      | 3       | 0                     | 48           | -1004.1                                     |
| Between a, a' domains | Dimer                      | 1       | 1                     | 42           | -967.5                                      |
| Between a, a' domains | Dimer                      | 2       | 1                     | 42           | -967.5                                      |
| Between a, a' domains | Dimer                      | 3       | 1                     | 42           | -967.5                                      |
| Between a, a' domains | Dimer                      | 1       | 2                     | 37           | -850.7                                      |
| Between a, a' domains | Dimer                      | 2       | 2                     | 37           | -850.7                                      |
| Between a, a' domains | Dimer                      | 3       | 2                     | 37           | -850.7                                      |
| Between a, a' domains | Dimer                      | 1       | 3                     | 32           | -869.5                                      |
| Between a, a' domains | Dimer                      | 2       | 3                     | 32           | -869.5                                      |
| Between a, a' domains | Dimer                      | 3       | 3                     | 32           | -869.5                                      |
| Between a, a' domains | Dimer                      | 1       | 4                     | 31           | -855.9                                      |
| Between a, a' domains | Dimer                      | 2       | 4                     | 31           | -855.9                                      |
| Between a, a' domains | Dimer                      | 3       | 4                     | 31           | -855.9                                      |

|                       |       |   |   |    |        |
|-----------------------|-------|---|---|----|--------|
| Between a, a' domains | Dimer | 1 | 5 | 30 | -867.8 |
| Between a, a' domains | Dimer | 2 | 5 | 30 | -867.8 |
| Between a, a' domains | Dimer | 3 | 5 | 30 | -867.8 |
| Between a, a' domains | Dimer | 1 | 6 | 26 | -816.8 |
| Between a, a' domains | Dimer | 2 | 6 | 26 | -816.8 |
| Between a, a' domains | Dimer | 3 | 6 | 26 | -816.8 |
| Between a, a' domains | Dimer | 1 | 7 | 26 | -830.4 |
| Between a, a' domains | Dimer | 2 | 7 | 26 | -830.4 |
| Between a, a' domains | Dimer | 3 | 7 | 26 | -830.4 |
| Between a, a' domains | Dimer | 1 | 8 | 23 | -832.4 |
| Between a, a' domains | Dimer | 2 | 8 | 23 | -832.4 |
| Between a, a' domains | Dimer | 3 | 8 | 23 | -832.4 |
| Between a, a' domains | Dimer | 1 | 9 | 23 | -808.1 |
| Between a, a' domains | Dimer | 2 | 9 | 23 | -808.1 |
| Between a, a' domains | Dimer | 3 | 9 | 23 | -808.1 |



**Tab. S5: Statistics describing the lowest-interface-energy structures of monomer AGR2-PDIA3 complex generated by Rosetta online server.**

| Decoy                                              | 1            | 2            | 3            | 4            | 5            | 6            | 7            | 8            | 9            | 10           |
|----------------------------------------------------|--------------|--------------|--------------|--------------|--------------|--------------|--------------|--------------|--------------|--------------|
| <b>Total score [a.u.]</b>                          | -<br>568.341 | -<br>568.301 | -<br>568.150 | -<br>568.019 | -<br>567.959 | -<br>567.955 | -<br>567.876 | -<br>567.850 | -<br>567.830 | -<br>567.829 |
| <b>RMSD [Å]</b>                                    | 0.703        | 0.696        | 0.7          | 0.711        | 0.701        | 0.692        | 0.702        | 0.657        | 0.659        | 0.659        |
| <b>Interface score [a.u.]</b>                      | -25.705      | -25.494      | -25.772      | -25.421      | -25.911      | -25.748      | -25.728      | -25.681      | -25.517      | -25.517      |
| <b>Irms [Å]</b>                                    | 0.251        | 0.252        | 0.246        | 0.249        | 0.249        | 0.254        | 0.246        | 0.238        | 0.241        | 0.242        |
| <b>Van der Waals attractive energy [kcal/mol]</b>  | -<br>971.089 | -<br>970.761 | -<br>970.476 | -<br>969.692 | -<br>970.086 | -<br>970.522 | -<br>969.701 | -<br>970.016 | -<br>969.876 | -<br>969.876 |
| <b>Side-chain conformational energy [kcal/mol]</b> | 40.91        | 40.902       | 40.863       | 40.909       | 40.806       | 40.743       | 40.85        | 40.87        | 40.954       | 40.954       |
| <b>Electrostatic energy [kcal/mol]</b>             | -6.857       | -6.917       | -6.922       | -6.838       | -6.917       | -6.842       | -6.905       | -6.876       | -6.844       | -6.844       |
| <b>Pair-wise interaction energy [kcal/mol]</b>     | -21.289      | -21.464      | -21.42       | -21.215      | -21.517      | -21.347      | -21.335      | -21.525      | -21.243      | -21.243      |
| <b>Van der Waals repulsive energy [kcal/mol]</b>   | 33.62        | 33.652       | 33.578       | 33.517       | 33.546       | 33.703       | 33.571       | 33.556       | 33.472       | 33.472       |
| <b>Solvation energy [kcal/mol]</b>                 | 418.384      | 418.443      | 418.198      | 417.307      | 418.053      | 418.14       | 417.562      | 417.8        | 417.322      | 417.322      |

**Tab. S6: Statistics describing the lowest-interface-energy structures of dimer AGR2-PDIA3 complex generated by Rosetta online server.**

| Decoy                                              | 1             | 2             | 3             | 4             | 5             | 6             | 7             | 8             | 9             | 10            |
|----------------------------------------------------|---------------|---------------|---------------|---------------|---------------|---------------|---------------|---------------|---------------|---------------|
| <b>Total score [a.u.]</b>                          | -584.642      | -584.381      | -584.369      | -584.365      | -584.039      | -584.022      | -583.462      | -583.232      | -582.950      | -582.935      |
| <b>RMSD [Å]</b>                                    | 2.452         | 2.569         | 2.677         | 2.346         | 2.433         | 2.702         | 2.776         | 3.632         | 2.556         | 3.067         |
| <b>Interface score [a.u.]</b>                      | -7.215        | -7.097        | -6.787        | -7.174        | -7.309        | -6.442        | -6.314        | -6.563        | -5.587        | -5.633        |
| <b>Irms [Å]</b>                                    | 1.217         | 1.313         | 1.173         | 1.099         | 1.119         | 1.241         | 1.278         | 1.349         | 1.056         | 1.234         |
| <b>Van der Waals attractive energy [kcal/mol]</b>  | -<br>1082.204 | -<br>1082.136 | -<br>1081.417 | -<br>1082.816 | -<br>1081.797 | -<br>1080.617 | -<br>1080.334 | -<br>1079.975 | -<br>1081.692 | -<br>1081.373 |
| <b>Side-chain conformational energy [kcal/mol]</b> | 56.399        | 56.386        | 56.27         | 56.598        | 56.368        | 56.136        | 56.351        | 56.286        | 56.369        | 56.438        |
| <b>Electrostatic energy [kcal/mol]</b>             | -6.991        | -6.986        | -6.932        | -6.936        | -6.925        | -6.978        | -6.958        | -6.995        | -6.911        | -7.018        |
| <b>Pair-wise interaction energy [kcal/mol]</b>     | -19.577       | -19.364       | -19.408       | -19.565       | -19.416       | -19.73        | -19.422       | -19.563       | -18.956       | -19.282       |
| <b>Van der Waals repulsive energy [kcal/mol]</b>   | 78.201        | 78.095        | 78.197        | 78.505        | 78.171        | 78.657        | 78.125        | 78.32         | 78.482        | 78.084        |
| <b>Solvation energy [kcal/mol]</b>                 | 450.919       | 450.963       | 450.269       | 451.303       | 450.952       | 449.846       | 450.093       | 449.844       | 450.987       | 451.463       |

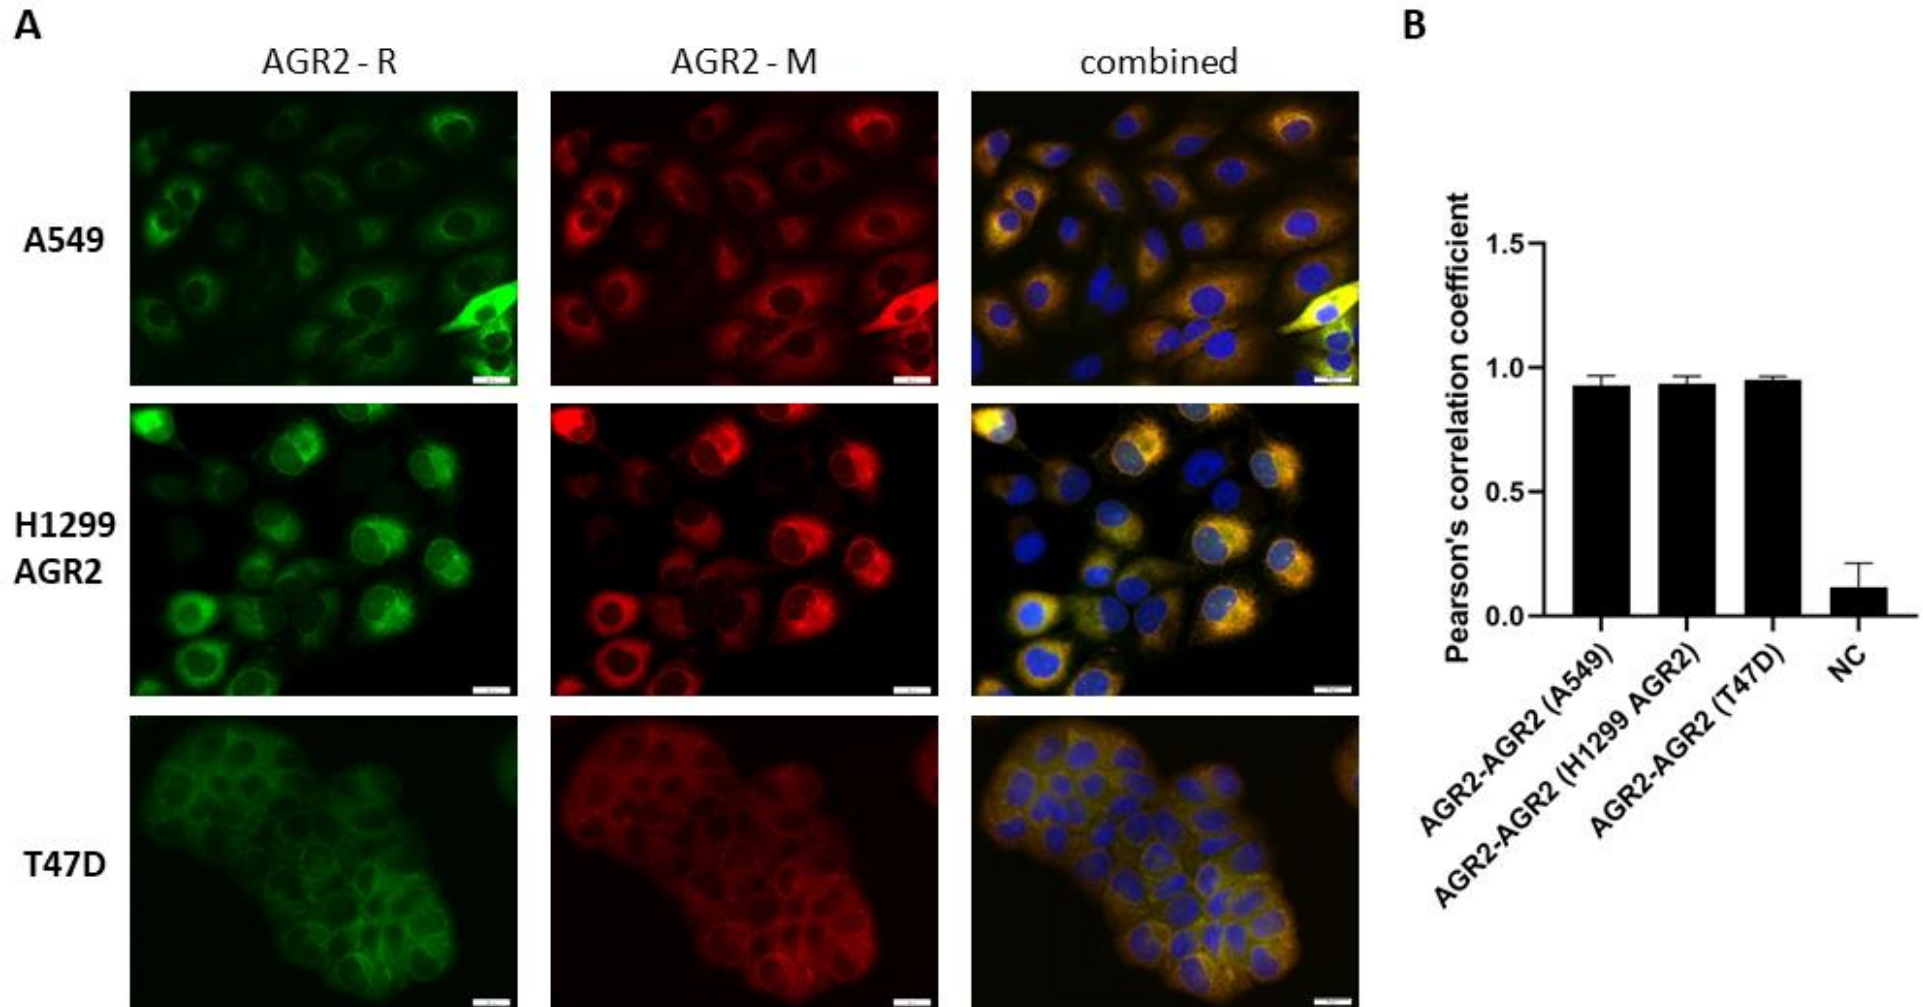

**Fig. S1 (related to Fig. 3): Immunofluorescence staining of AGR2 in various cell lines and its quantification. (A)** Various cell lines were stained with two different anti-AGR2 antibodies: a rabbit polyclonal from Abcam (AGR2-R) and a mouse monoclonal from Abnova (AGR2-M) labelled by Alexa Fluor 532 goat anti-rabbit IgG and Alexa Fluor 488 (both Abcam), respectively, and served as positive control. Cell nuclei (blue) were stained by Hoechst 33342. Scale bar is 20  $\mu$ m. **(B)** Quantification of positive and negative controls using Fiji software.

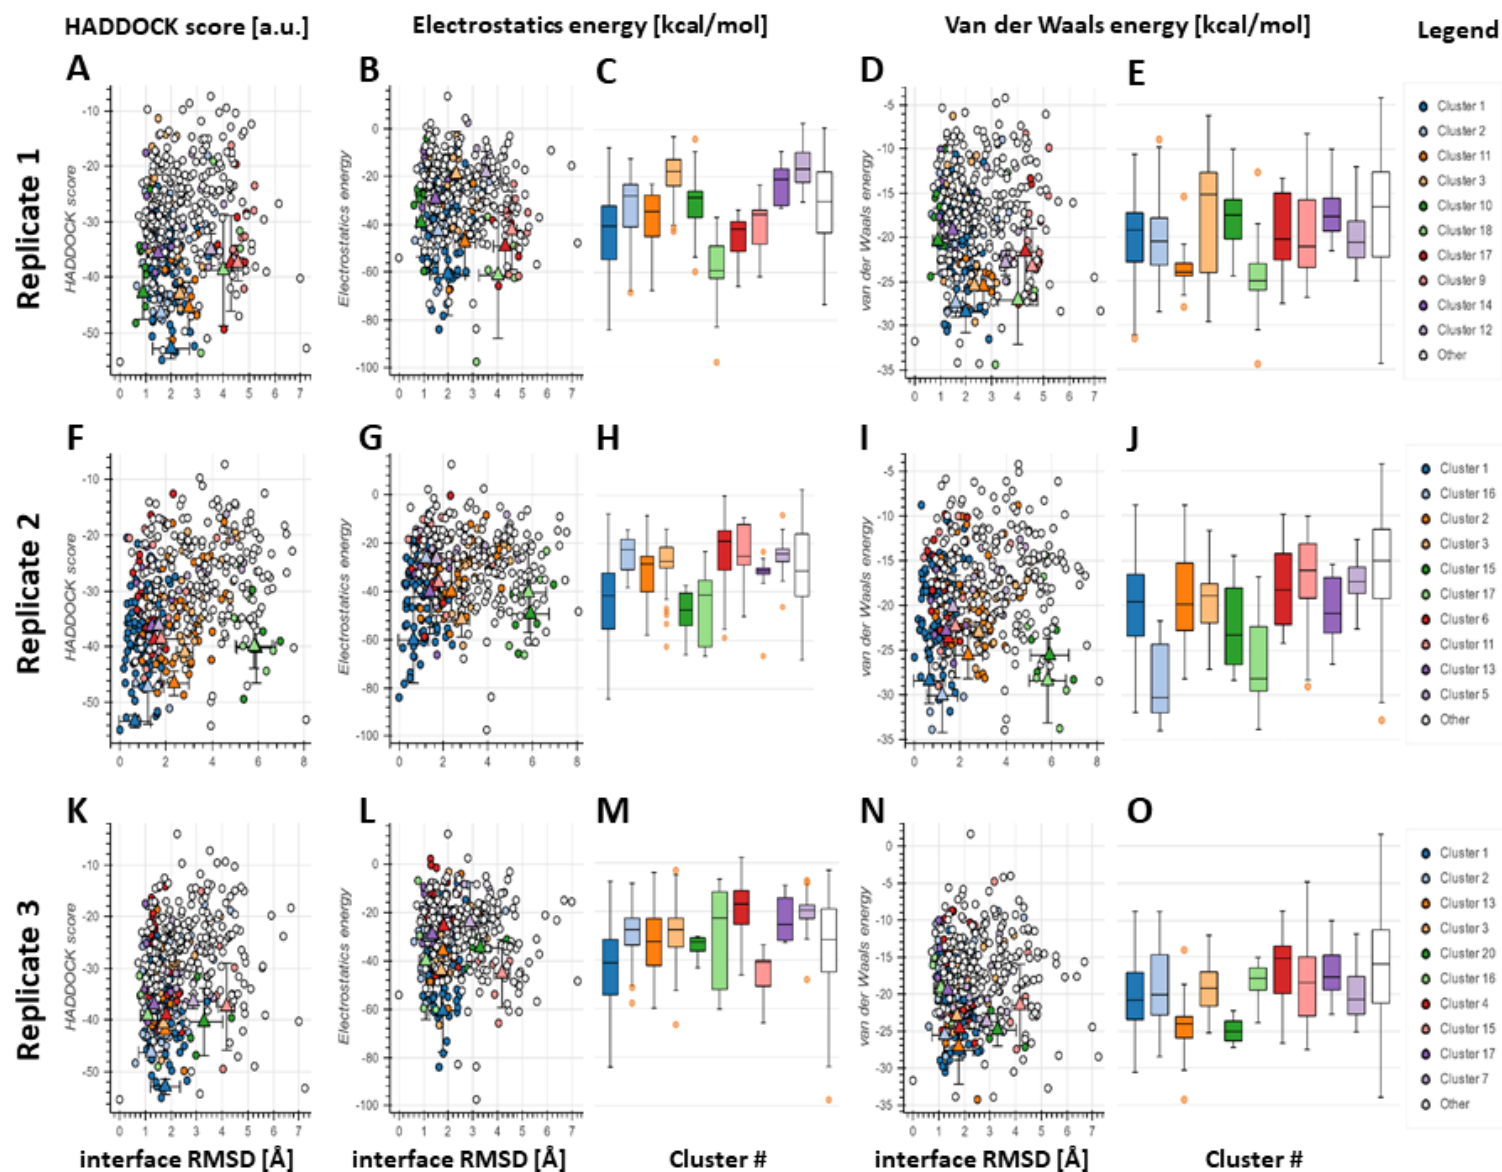

**Fig. S2: Comparative analysis of AGR2-E7 peptide docking results across triplicates.** Rows (A-E, F-J, and K-L) show results for individual replicates. The first column (A, F, K) shows the HADDOCK score for each individual docking pose and for the obtained clusters (with their associated dispersion measures) as a function of the interface RMSD. The second column (B, G, L) shows the Electrostatics energy term as a function of the interface RMSD. The third column (C, H, M) provides detail on the dispersion of the

obtained clusters on this Electrostatics energy metric. The fourth column (D, I, N) shows the van der Waals energy term as a function of the interface RMSD. The fifth column (E, J, O) provides detail on the dispersion of the obtained clusters on this van der Waals energy metric. To the right, a legend identifying the clusters in each replicate.

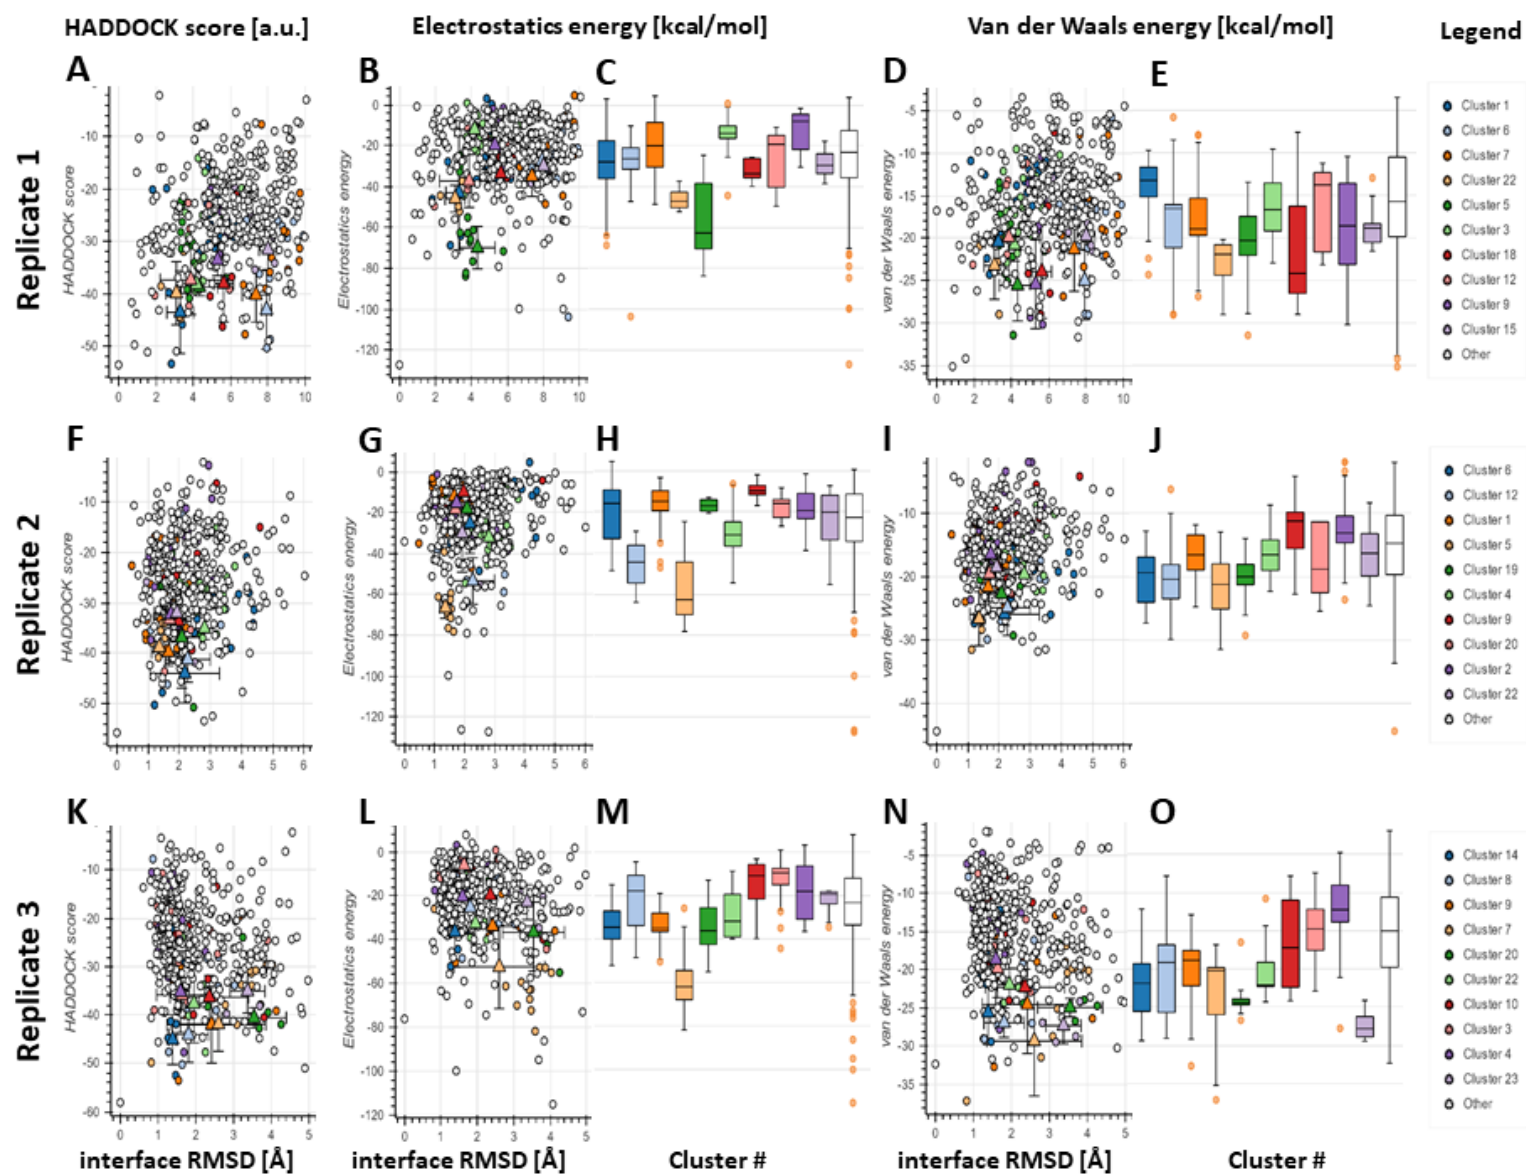

**Fig. S3: Comparative analysis of AGR2-F4 peptide docking results across triplicates.** Rows (A-E, F-J, and K-L) show results for individual replicates. The first column (A, F, K) shows the HADDOCK score for each individual docking pose and for the obtained clusters (with their associated dispersion measures) as a function of the interface RMSD.

The second column (B, G, L) shows the Electrostatics energy term as a function of the interface RMSD. The third column (C, H, M) provides detail on the dispersion of the obtained clusters on this Electrostatics energy metric. The fourth column (D, I, N) shows the van der Waals energy term as a function of the interface RMSD. The fifth column (E, J, O) provides detail on the dispersion of the obtained clusters on this van der Waals energy metric. To the right, a legend identifying the clusters in each replicate.

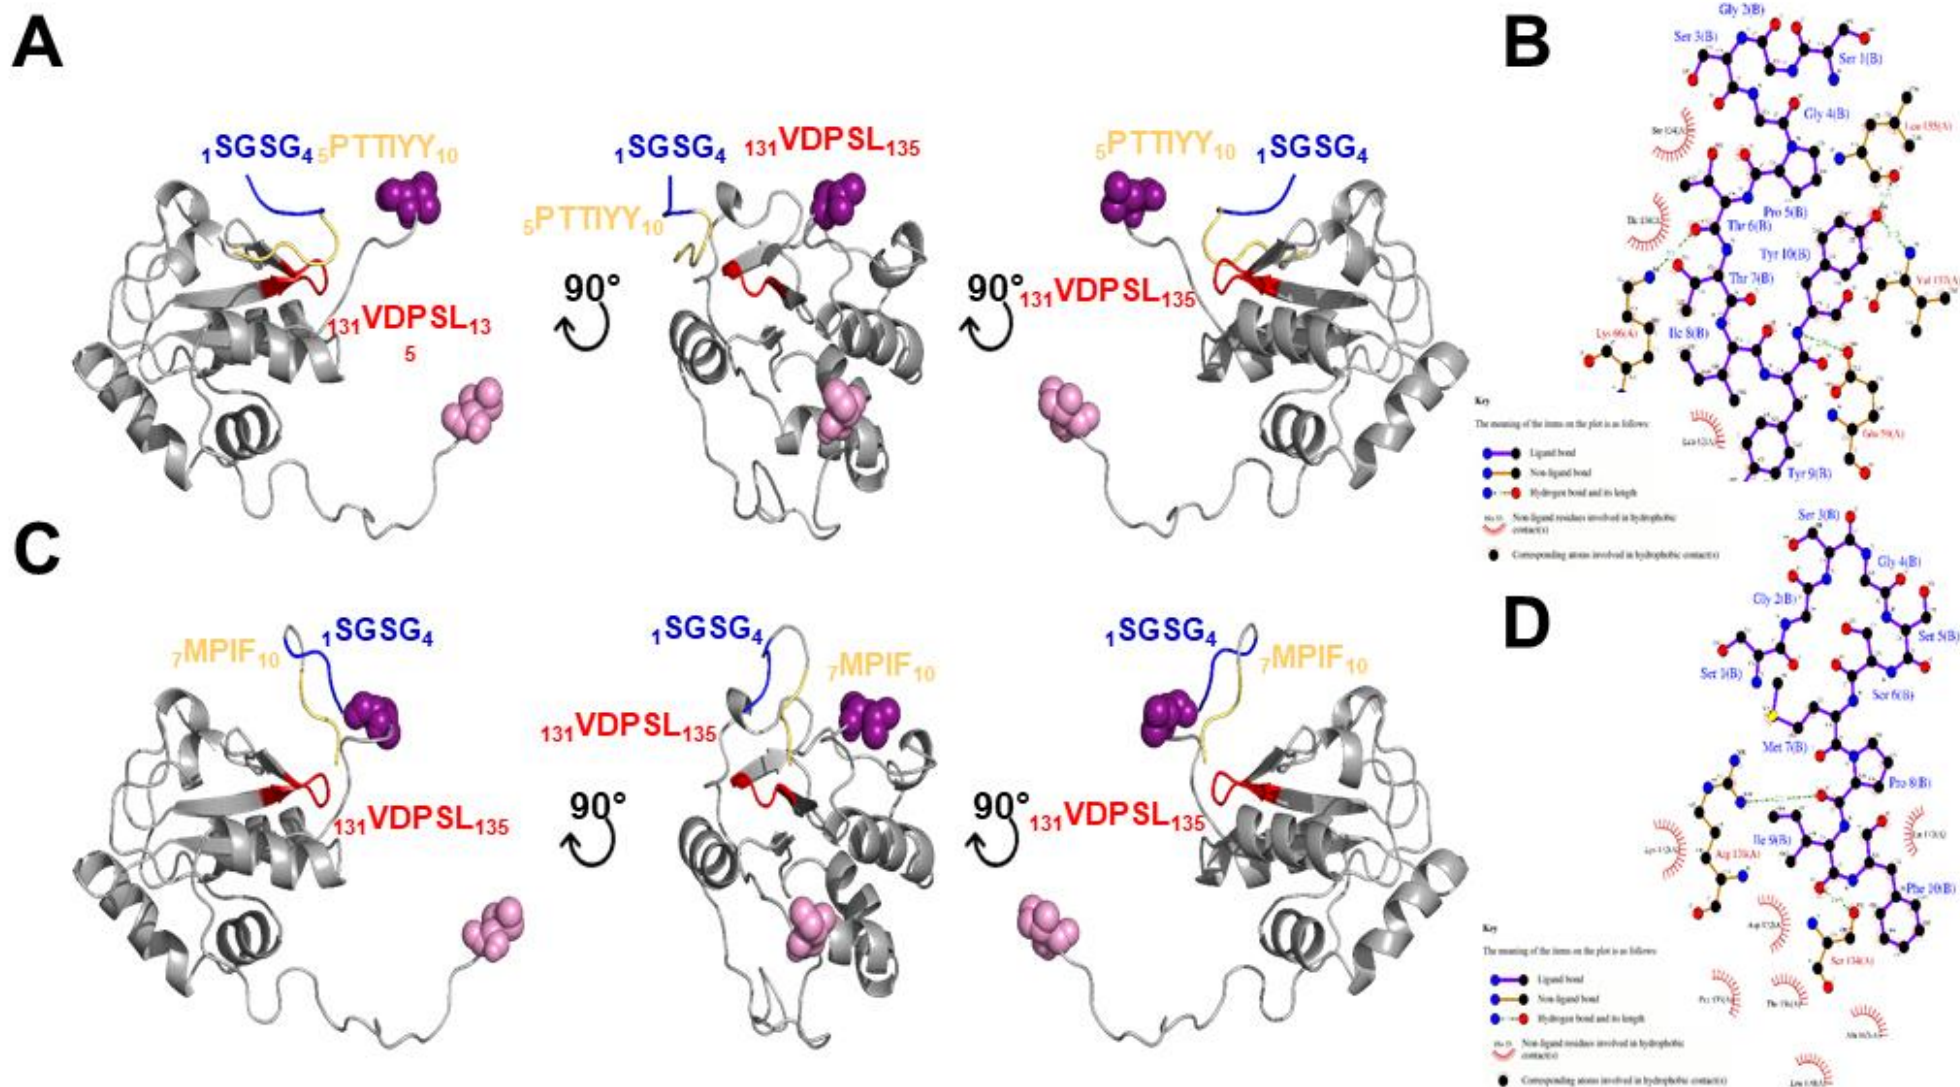

**Fig. S4: Graphical summary of E7 and F4 peptides docking to AGR2.** PyMOL software (The PyMOL Molecular Graphics System, Version 2.0 Schrödinger, LLC) was used for visualization of structures. PDBsum web server (<http://www.ebi.ac.uk/thornton-srv/databases/pdbsum/Generate.html>; (36)) was used for visual inspection of generated models to show interface interactions. The best scored model from the top ranked cluster has been chosen for inspection (A). Best AGR2-E7 peptide docking result. Binding residues from AGR2 highlighted in red, N-terminal motif of the peptide in blue, and C-terminal motif in yellow. N- and C-termini of AGR2 highlighted in light and dark purple



solid van der Waals radii spheres, respectively. (B) Interactions near the interface in between AGR2 and E7 peptide predicted by PDBsum. (C). Best AGR2-F4 peptide docking result. Details as in (A). (D) Interactions near the interface in between AGR2 and F4 peptide predicted by PDBsum.

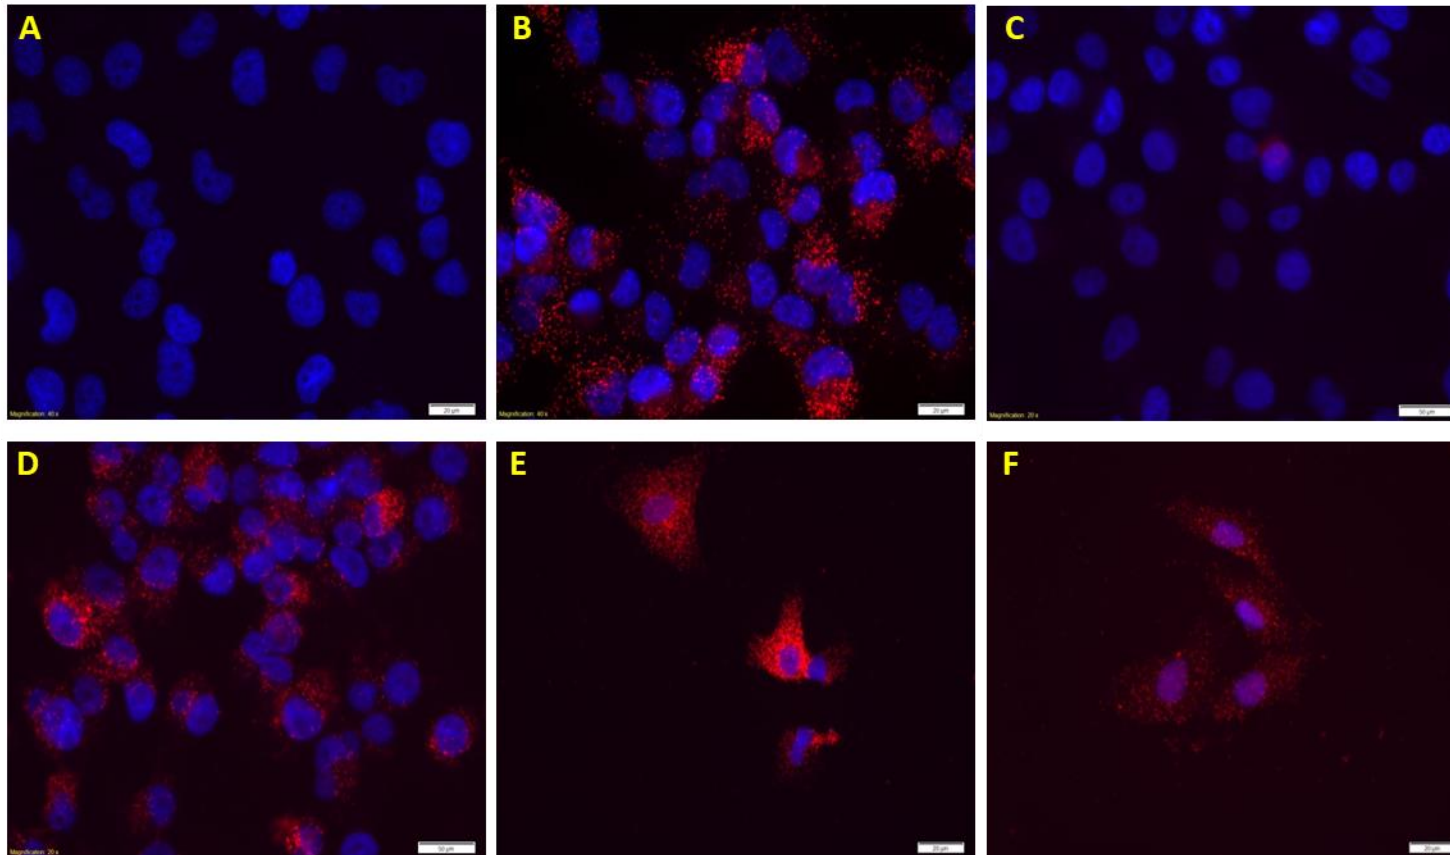

**Fig. S5: Proximity ligation assay (PLA) was used to confirm interaction of AGR2 with PDIA3 and PDIA6 in different cell lines (related to Fig. 4).** PLA for: (A) AGR2 and PDIA3 in H1299 cells (negative control), (B) AGR2 and PDIA3 in H1299-AGR2 cells, (C) AGR2 and PDIA6 in H1299 cells (negative control), (D) AGR2 and PDIA6 in H1299-AGR2 cells, (E) AGR2 and PDIA3 in A549 cells and (F) AGR2 and PDIA6 in A549 cells. Cell nuclei (blue) were stained by DAPI. Scale bar is 20  $\mu$ m.

**A**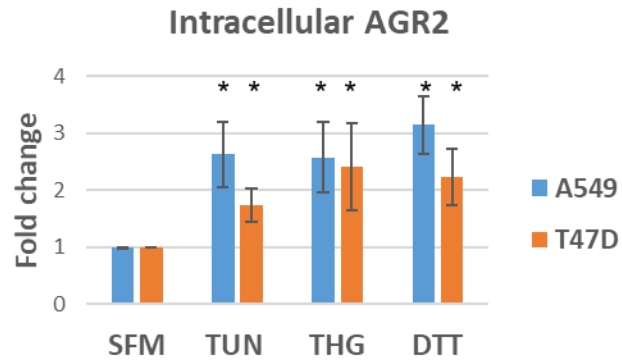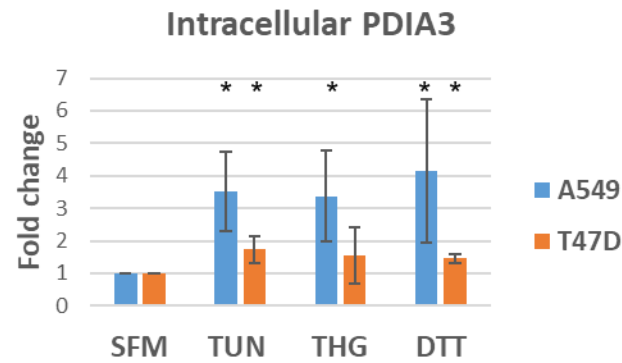**B**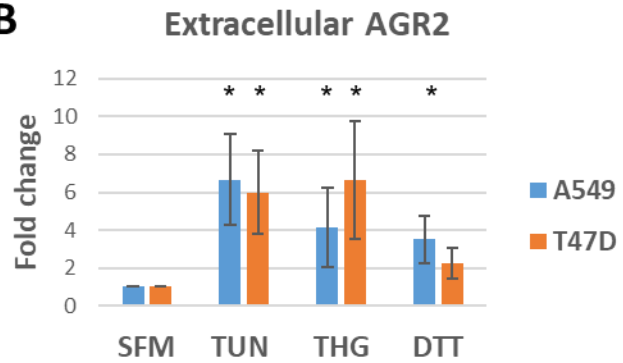**C**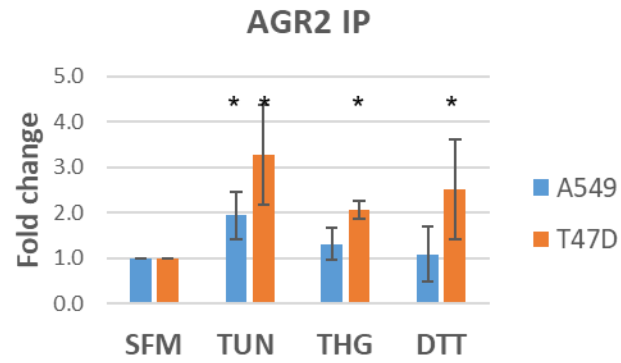**D**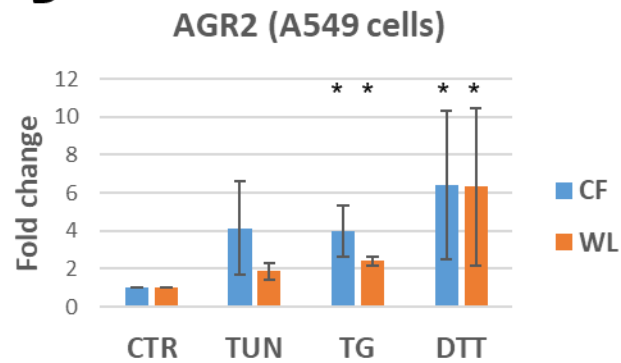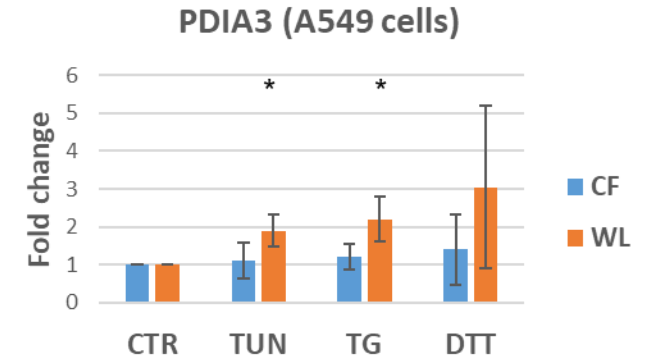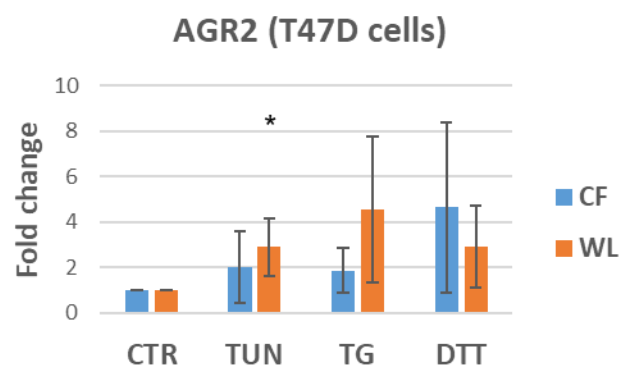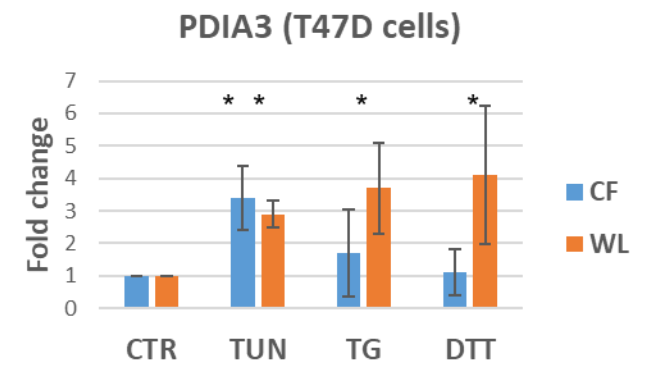

**Fig. S6 (on the previous page): Quantification of the protein levels in T47D and A549 cell lines (related to Fig. 6).** Data were obtained from three independent biological experiments as a mean  $\pm$  SD, where \* indicates ( $p \leq 0.05$ , One-way ANOVA). (A) AGR2 and PDIA3 levels in whole cell lysates, (B) extracellular AGR2, (C) AGR2-PDIA3 complex level, (D) AGR2 and PDIA3 levels in cytosolic fraction (CF) and whole cell lysate (WL).

## Legends of Data files

**Data file S1: Mass spectrometry protein and peptide level data for identification of potential AGR2 interacting partners in T47D cells using label-free quantitation.** Legend: expI=cells with DSP treatment, expC=cells without DSP treatment.

**Data file S2: Mass spectrometry protein and peptide level data for identification and verification of potential AGR2 interacting partners in H1299 cells using SILAC quantitation.**

**Data file S3: Docking solutions in binding site in between a and a' domains.** Pymol session containing all solutions in the top10 ranking docking poses from GalaxyHeteromer and ClusPro triplicate experiments using AGR2 monomer or dimer and PDIA3 that resulted in binding in between a and a' domains. The different pymol objects are identified as follows MM\_Q\_R\_C, where MM stands for Method, Q for quaternary structure, R for replica and C for cluster number (rank). The method legend is GH for Galaxy Heteromer or CP for ClusPro. The quaternary structure legend applies to AGR2 and is M for its monomeric state and D for its dimeric one. The replica number ranges in between 1 and 3. The lower cluster number indicates a better ranking in the docking experiment.

**Data file S4: Docking solutions in b-domain binding site.** Pymol session containing all solutions in the top10 ranking docking poses from GalaxyHeteromer and ClusPro triplicate experiments using AGR2 monomer or dimer and PDIA3 that resulted in binding the b-domain. Legends as in **Data file S3**.

**Data file S5: Docking solutions in b'-domain binding site.** Pymol session containing all solutions in the top10 ranking docking poses from GalaxyHeteromer and ClusPro triplicate experiments using AGR2 monomer or dimer and PDIA3 that resulted in binding the b'-domain. Legends as in **Data file S3**.

**Data file S6: Docking solutions in other binding sites.** Pymol session containing all solutions in the top10 ranking docking poses from GalaxyHeteromer and ClusPro triplicate experiments using AGR2 monomer or dimer and PDIA3 that resulted in other binding sites. Legends as in **Data file S3**.

**Data file S7: Docking solutions for Galaxy Heteromer AGR2monomer-PDIA3 triplicate experiment.** Pymol session containing all solutions in the top10 ranking docking poses from GalaxyHeteromer triplicate experiments using AGR2 monomer and PDIA3. Legends as in **Data file S3**.

**Data file S8: Docking solutions for Galaxy Heteromer AGR2dimer-PDIA3 triplicate experiment.** Pymol session containing all solutions in the top10 ranking docking poses from GalaxyHeteromer triplicate experiments using AGR2 dimer and PDIA3. Legends as in **Data file S3**.

**Data file S9: Docking solutions for Galaxy Heteromer AGR2monomer-PDIA3 triplicate experiment.** Pymol session containing all solutions in the top10 ranking docking poses from ClusPro triplicate experiments using AGR2 monomer and PDIA3. Legends as in **Data file S3**.

**Data file S10: Docking solutions for Galaxy Heteromer AGR2dimer-PDIA3 triplicate experiment.** Pymol session containing all solutions in the top10 ranking docking poses from ClusPro triplicate experiments using AGR2 dimer and PDIA3. Legends as in **Data file S3**.

**Data file S11: List of AGR2 interactors presented in three independent studies.** Annotation and gene ontology analysis of AGR2 interactors overlapping in three independent studies.
